# Supplementary material for: Orally bioavailable glutamine antagonist prodrug JHU-083 penetrates mouse brain and suppresses the growth of MYC-driven medulloblastoma
Source: PubMed Central journal article supplement — Transl Oncol. 2019 Jul 21;12(10):1314–22. doi: 10.1016/j.tranon.2019.05.013 (PMC6657308; doi:10.1016/j.tranon.2019.05.013), 2019-07-21
Supplement: mmc1.pdf [file mmc1.pdf]

| Loci    | Med 211 |
|---------|---------|
| AMEL    | X,Y     |
| CSF1PO  | 11      |
| D13S317 | 13,14   |
| D16S539 | 11,12   |
| D21S11  | 30      |
| D5S818  | 10,11   |
| D7S820  | 11      |
| TH01    | 6,8     |
| TPOX    | 10,11   |
| vWA     | 15,10   |

| Loci    | CB p53/ht akt myc |
|---------|-------------------|
| AMEL    | X                 |
| CSF1PO  | 8,11              |
| D13S317 | 8,11              |
| D16S539 | 11,14             |
| D21S11  | 30                |
| D5S818  | 11,12             |
| D7S820  | 11,13             |
| TH01    | 7,9,3             |
| TPOX    | 8,10              |
| vWA     | 10,19             |

| Loci    | D425     |
|---------|----------|
| AMEL    | X        |
| CSF1PO  | 9,12     |
| D13S317 | 11       |
| D16S539 | 11,12    |
| D21S11  | 29,33,2  |
| D5S818  | 12,13,14 |
| D7S820  | 11,12    |
| TH01    | 6,9,3    |
| TPOX    | 8        |
| vWA     | 16,17    |

| Loci    | CB SV40 |
|---------|---------|
| AMEL    | X       |
| CSF1PO  | 11      |
| D13S317 | 11,12   |
| D16S539 | 10,13   |
| D21S11  | 29,31   |
| D5S818  | 11,12   |
| D7S820  | 8,10    |
| TH01    | 8,9,3   |
| TPOX    | 8,9     |
| vWA     | 13,18   |

| Loci    | CB mvc    |
|---------|-----------|
| AMEL    | X         |
| CSF1PO  | 11,12     |
| D13S317 | 8,14      |
| D16S539 | 11,13     |
| D21S11  | 29,2,31,2 |
| D5S818  | 12        |
| D7S820  | 8,10      |
| TH01    | 6,9       |
| TPOX    | 8,11      |
| vWA     | 14,17     |
