# Supplementary figures and images for: Orally bioavailable glutamine antagonist prodrug JHU-083 penetrates mouse brain and suppresses the growth of MYC-driven medulloblastoma
Source: PubMed Central journal article supplement — Transl Oncol. 2019 Jul 21;12(10):1314–22. doi: 10.1016/j.tranon.2019.05.013 (PMC6657308; doi:10.1016/j.tranon.2019.05.013), 2019-07-21

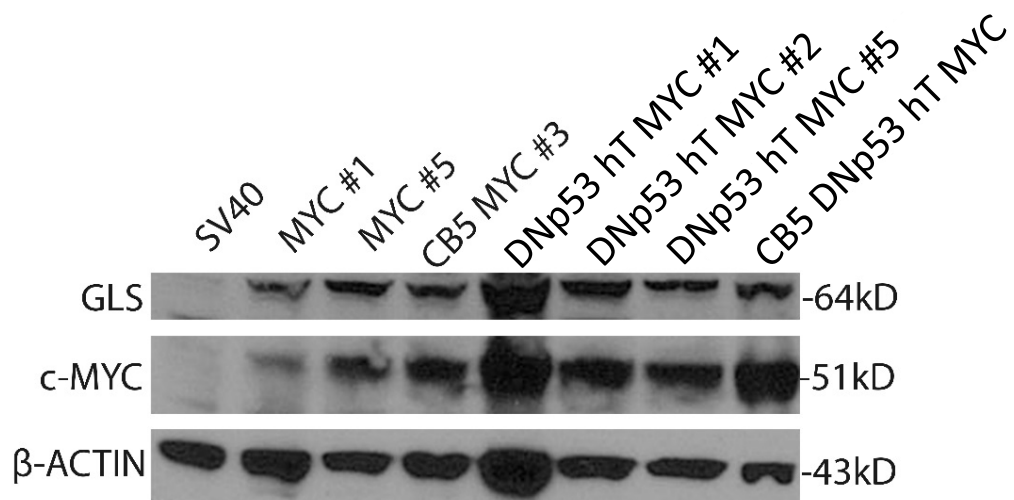

Supplement: mmc2.pdf [file mmc2.pdf]
